# Supplementary material for: System Thinking for Sustainable Water Management: The Use of System Tools in Sustainability Transitions
Source: Springer Nature journal article supplement (doi:10.1007/s11269-023-03723-6), 2024-02-03
Supplement: MOESM1 [file 26698698]

*Supplementary Document*

**System Tools: General Functions and Application in Water-related Studies**

**Methodology**

A traditional literature review has been used to identify key system tools and investigate how they have been applied in addressing complex water challenges. Although an enormous number of techniques, methods and methodologies have been developed and applied by systems practitioners or researchers in different fields, their classification as ‘system tools’ is challenging. Here we refer to any techniques, methods or methodologies (also composed of a set of different techniques or methods applied in an orderly manner) that can be used to facilitate systems thinking for addressing complex challenges (Jackson 2019; Kim 2000).

Published papers that use such tools or claim to apply system thinking as part of the effort to address water-related challenges were selected for review. This method is still valuable and appropriate for brief reviews and those which do not need to be exhaustive. To manage selection bias and publication bias, aspects of the systematic review method, such as systematic searching, screening, and critical appraisal, as suggested by Haddaway et al. (2015) and James et al. (2016). The overall approach has been chosen due to its efficiency, ease of accessing resources, cost-effectiveness and broad coverage (Bowen 2009).

The keyword search strategy was used for the selection of documents as well as several criteria to guide the screening process with exemption given to studies that the researchers found useful in terms of offering additional insights. A total number of 49 documents including peer-reviewed articles, chapters from academic textbooks and grey literature (from websites, blogs and proceeding papers) were selected (Table 1). A thematic analysis was also conducted on the selected documents adapting the methodology used by Rahmati-Khameneh et al. (2011) and Wan Rosely and Voulvoulis (2022).

As with the majority of qualitative studies, the design of the current study is subject to limitations, particularly due to the restricted number of documents and studies used, due to limited time and resources (Bowen 2009). The main findings of the work are based on evidence collected from the collection of documents studied, which is by no means complete. Therefore, this study should not be used to generalise the application, advantages, and limitations of system tools as well as to suggest the potential or disadvantages of the current application of systems tools in addressing water challenges. Moreover, the thematic analysis used in this study is also heavily dependent on the judgement of the researchers who have to decide which themes to include and how to code the data (Bowen 2009). In addition, despite the critical analysis of each study undertaken to answer research questions, findings are still heavily reliant on the researchers’ understanding and interpretation of the information given in the documents (Morgan 2022).

**Table 1: Summary of Approaches and Selection of Documents for Analysis**

| **Research Question** | **Search Approach** | **Guiding Selection Criteria** | **Number of document** |
| --- | --- | --- | --- |
| How do system tools work? | Using the keywords “systems tool*” or “systems thinking tool*” | - Discuss in general about system tools and their application - Provide a list of system tools and a brief description of the function of each tool | 14 |
| How they have been applied in water management? | Using the keyword “water + ‘name of the tools’” in Web of Science or Google Search | - Research work or feasibility studies between 2015-2022. Review papers are excluded - The systems tool applied is common in water-related studies | 35 |

`

***Appendix 1***

**Table 1: The 40 *system tools* included in the study**

|  | **Tools** | **Function of Tools** | **Application** | **Reference** |
| --- | --- | --- | --- | --- |
|  | Rich Pictures (mind map) | Rich Picture is an individual or group method of creating a visual representation as a way to explore, acknowledge and define a situation and express it through diagrams to create a preliminary mental model actively reflecting on various perspectives (Acaroglu 2017). It is not meant to be precise or detailed technical diagrams; rather, they are subjective representations of stakeholders' mental models and perceptions (Checkland and Jim Scholes 1991). It can help to open discussion and come to a broad, shared understanding of complex and ambiguous water management issues such as water service disruptions in cities that involve multiple stakeholders such as households, businesses, industries, water companies, regulators and policy makers who hold different perceptions, interests and expectations towards the issue. Rich Pictures is commonly used with SSM. | Public Policy, Environment, Sustainability | Allen and Kilvington n.d.; Bryan Lindsley 2022; Burge Hughes Walsh n.d.; DEFRA 2022; Government Office for Science 2022 |
|  | Pig Model | Pig Model aims to explore how the problem/policy/system is seen by different stakeholders. It is called the pig model based on an original example provided by Gareth Morgan (1997) and adapted by systems thinking experts in the Defence Science and Technology Laboratory (DSTL) (Government Office for Science 2022; McCourt 1997). The simple example is, to consider how a pig might be seen by others, for example, a wolf, farmer, poet and veterinarian (see figure below). Each one will see the pig differently, as food, income, inspiration or a patient respectively. The example aims to illustrate how our view of the world, and the significance we give to parts of the system, will vary according to our frame of reference, which in turn is influenced by the direction we are given by senior civil servants and politicians, but also our background, beliefs, values et cetera. Thus, the problem or system that we are interested in can be many things at once and the simple question of ‘What is the Pig?’ is often difficult as ‘the pig’ is many things at once. In engaging stakeholders in addressing water challenges, the discussion can start with ‘What is 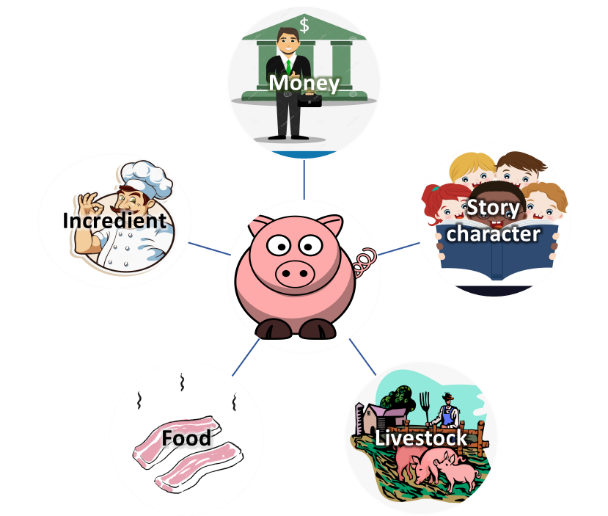the water system?’. | Public Policy | Government Office for Science 2022 |
|  | CATWOE | CATWOE stands for Customers – Actors – Transformation process – World view – Owners – Environmental constraints (Checkland and Jim Scholes 1991). The CATWOE Analysis makes it possible to identify problem areas in water management by looking at who are the customers or beneficiaries of the system (e.g.: local communities, industries, agriculture, ecosystems), who are the key actors or participants that have a role in water management (e.g.: water authorities, government agencies, NGOs, water users, and policymakers), what is the core transformation process or activity in the system (e.g.: distribution of water, irrigation practices, water conservation measures), societal and cultural context that influences water management decisions and practices, ownership or responsibility for the system, environmental constraints or limitations that impact the system (e.g.: water availability, climate, and ecosystem health). The analysis uses thought solutions from multiple perspectives. | Public Policy | Allen and Kilvington n.d.; Burge Hughes Walsh n.d.; DEFRA 2022; Government Office for Science 2022 |
|  | QQ Diagram (quantile-quantile plot) | QQ Diagram captures free-flowing thoughts in a structured manner and distinguishes between “hard” (quantitative) and “soft” (qualitative) variables that affect the issue of interest (Bryan Lindsley 2022; D. Kim n.d.). It can be used in hydrology and water resources management to analyse the distribution of various water-related variables, such as river flow, precipitation, water quality parameters, groundwater levels and others. QQ Diagram is structured during a brainstorming session; to help participants see the whole system they are interested in. The QQ plot, or quantile-quantile plot, is a graphical tool to help us assess if a set of data plausibly came from some theoretical distribution such as a normal or exponential (Dodge 2008). For example, if we run a statistical analysis that assumes our residuals are normally distributed, we can use a normal QQ plot to check that assumption. It’s just a visual check, not an air-tight proof, so it is somewhat subjective. But it allows us to see at at-a-glance if our assumption is plausible, and if not, how the assumption is violated and what data points contribute to the violation. | Systems Engineering | Bryan Lindsley 2022; Kim 2000 |
|  | Soft Systems Methodology (SSM) | Soft Systems Methodology (SSM) is used for brainstorming to facilitate collaboration between people from different groups to develop new insights and a shared understanding. Similarly, it can help understand how most complex problems, such as water scarcity cannot be solved only by purely technological means as the causes often involve organisational, political, economic, environmental, ethical, and sociological components (Checklands 1999). The tool can help collect and organise ideas from multiple perspectives, dimensions or disciplines when conceptualising complex systems and problems. A methodology that leverages stakeholders’ mental models to structure complex problems and to develop desirable and feasible changes within a differentiated heterogenous group of people using various documentation and diagramming methods such as Rich Picture and CATWOE (Checklands 1999; Dalkin et al. 2018; Jackson 2019). ﻿The steps involved include problem identification, problem situation, and root definition. It enables unquantifiable variables (such as cultural and political) that influence decisions to be objectively factored.  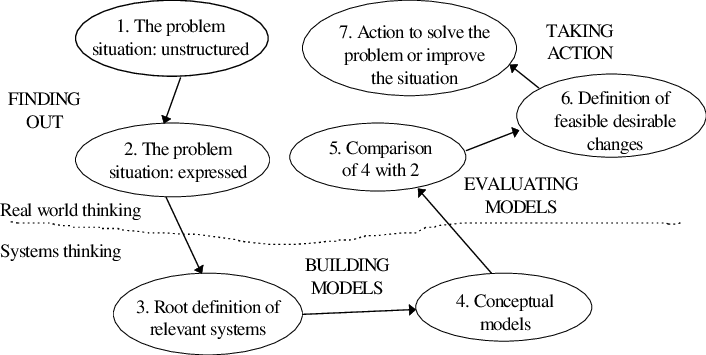  Adapted from Jackson (2019) | Public Policy, Health, Environment, Systems Research, Social, Sustainability | Allen and Kilvington n.d.; DEFRA 2022; Government Office for Science 2022; Swiss Tropical and Public Health Institute n.d. |
|  | Critical System Heuristic (CSH) | CSH is a framework for reflective practice based on practical philosophy and systems thinking (Jackson 2019). CSH emphasizes the importance of involving diverse stakeholders in the problem-solving process. Stakeholders are engaged in dialogue and decision-making, ensuring a broad representation of perspectives and interests. The name stands for three major concerns (Ulrich 2005). First, the aim is to enhance the ‘critical’ (reflective) competence not only of well-trained professionals and decision-makers but also of ordinary people. Second, reflective practice cannot be secured by theoretical means only but requires ‘heuristic’ support in the form of questions and argumentation tools that make a difference in practice, and third, ‘systems’ thinking can provide us with a useful starting point for understanding the methodological requirements of such an approach to reflective practice. | Public Policy, Management | Bryan Lindsley 2022; DEFRA 2022; Swiss Tropical and Public Health Institute n.d. |
|  | Viable System Model (VSM) | Developed by Stafford Beer, VSM is a theoretical framework to understand the structure and function of viable organisations and systems. The VSM is grounded in the principles of systems thinking, which is a way of understanding complex systems by examining their interconnections, relationships, and feedback loops rather than just analysing individual parts in isolation (Jackson 2019). It is based on the principles of cybernetics, which is the study of control and communication in systems, particularly the way systems self-regulate and maintain their stability while adapting to changes in their environment (Rezaee et al. 2019). Any viable system is comprised of five necessary and sufficient subsystems interactively involved in any organism or organisation capable of maintaining its identity in a changing environment: Operations, Coordination, Optimization, Development, and Valuation. VSM views the water system as a hierarchy of interconnected and interdependent sub-systems, each responsible for specific functions, such as water sourcing, treatment, distribution and wastewater management, which are capable to self-regulate and self-sustain in delivering its objectives and adapting to changing conditions and uncertainties. To achieve this, coordination and integration between different sub-systems within the water management system is essential to avoid conflicts, duplication of efforts, and suboptimal resource allocation. Therefore, using timely and accurate information, decision-makers at different levels need to be capable of adjusting their strategies and operations to cope with environmental, social, and economic changes. | Management | Jackson 2019 |
|  | Vanguard Method (VM) | VM is a methodology developed by John Seddon, used to improve a situation or organisation by first developing an understanding of the current situation people live in, collaboratively questioning the purpose of a system and co-designing a new system based on an in-depth understanding of customer needs and the actual work processes (Jackson 2019). It emphasises that a system is made of interdependent parts, where changes in one part can have consequences throughout the entire system (“Check, plan, do” n.d.). Rather than focusing on isolated processes, VM looks at how the whole system works together to achieve its purposes. Three important steps of VM start with ‘check’ to rigorously study the performance of a system and develop knowledge on how the how and why it performs, followed by ‘plan’ the service more efficiently (e.g.: at lower costs) and finally, ‘do’ or execute the plan. Applying VM in water management may start with identifying various customer demands and requirements related to water supply, water quality, environmental concerns, and other factors. Instead of relying on preconceived ideas or assumptions, we need to study and understand the actual work processes involved in water management by observing and analysing how water is sourced, treated, distributed, and managed, as well as the interactions between different stakeholders and entities involved in the process. Based on these, and information from frontline workers, redesigning the water system may involve streamlining processes, reducing unnecessary steps, and eliminating activities that do not add value in meeting customer’s demands. Data related to water management processes, customer feedback, and performance metrics is critical to ensure continuous improvement by learning from failures, making adjustments based on feedback, and continuously improving systems and processes. | Management | Jackson 2019 |
|  | Cynefin | Dave Snowden developed Cynefin as a sense-making framework, to facilitate decision-making by providing the contexts of a situation (cause and effect) through “sense-making” (perceiving situations and making sense of their own). It is useful for understanding and responding to complex adaptive systems. Cynefin categorises problems based on their complexity to suggest appropriate management and decision-making approaches for each domain (European Union 2021) There are five different types of system environments or domains which are i. obvious or clear whereby the situation is stable (cause and effect are known), ii. complicated, in which the outcome of a known situation requires further analysis or input (cause knows, but the effect needs further analysis), iii. complex is when the cause and the effect are unknown, iv. chaotic is when the cause and effect of a situation are not clear, and v. disordered, or confusion is when it is difficult to allocate the situation in any of the domains (Allen and Kilvington 2018; Bryan Lindsley 2022; European Union 2021). By applying the Cynefin framework in water management, decision-makers can better understand the nature of water-related challenges they are facing and tailor their approaches accordingly. Simple problems can be addressed through best practices and standard procedures, while complicated problems may require expert analysis. Complex problems demand experimentation, collaboration, and adaptive management, and chaotic situations require immediate action to stabilize and regain control. By recognizing the domain in which a water management problem lies, stakeholders can avoid inappropriate responses and make more effective decisions in addressing the challenges. | Health, Sustainability | Allen and Kilvington n.d.; Bryan Lindsley 2022; Swiss Tropical and Public Health Institute n.d. |
|  | Stakeholder (Influence) map/ Actor map | A Stakeholder Influence Map is a visual representation that helps identify and analyse various stakeholders involved in a project, initiative, organisation or policy and decision, and their relative influence and interest.  In systems thinking, this tool is used to enhance decision-making, communication, and engagement strategies by understanding stakeholders' influence and interactions within a complex system to allow for more informed decisions and create more effective strategies to achieve the system's objective (Bryan Lindsley 2022; Burge Hughes Walsh n.d.). The map typically consists of a matrix where stakeholders are plotted based on their influence (high to low) on one axis and their interest or involvement (high to low) on the other axis (Mayers and Vermeulen 2005). Another way of developing the Stakeholder (Influence) Map is using a pyramid whereby the policy objective or decision-making is put at the top of the pyramid while the stakeholder is put on a circle within the body of the pyramid. The closer a stakeholder is to the top of the pyramid, the stronger it influences the policy of decision. The size of the circle represents the number of stakeholders. The information from the stakeholder map can be used to tailor the level and type of engagement to their level of influence and interest. Stakeholders with high influence should be involved in decision-making processes. For stakeholders with high interest, keep them informed and address their concerns. This tailored approach can help practitioners better understand the landscape of stakeholders and their potential impacts on the success of water management initiatives. | Systems Engineering | Bryan Lindsley 2022; Burge Hughes Walsh n.d.; Chatzimichailidou and Whyte 2018 |
|  | Stakeholder Analysis | Stakeholder Analysis is a structured process for identifying, understanding, and assessing the interests, expectations, and influence of various stakeholders who are affected by or have an impact on a particular system or decisions. Stakeholders are usually identified using snowballing, grouping them according to their levels of participation, interest, and influence in the system, mapping them (e.g. power interest grid) and determining how best to involve and communicate each of these stakeholder groups throughout (D’Agostino et al. 2020; Stanghellini 2010). It adds up to a basic stakeholder map as it involves exploring the relationships and interactions between different stakeholders, identifying potential conflicts or alliances among them and understanding how these dynamics may impact water management processes (D’Agostino et al. 2020). In water management, stakeholder analysis can help develop more effective strategies, foster better communication, and navigate the challenges of complex systems with diverse stakeholders by engaging them, aligning project goals with their needs, and managing potential conflicts. | Environment, Public Policy, Health, Social, Sustainability | Allen and Kilvington n.d.; Swiss Tropical and Public Health Institute n.d. |
|  | Social Network Analysis (SNA) | SNA is an analytical modelling tool used to connect stakeholders or agents as a network. The stakeholders or agents are represented by individual points or nodes and lines or links that connect each of the nodes represent the relationship of the stakeholders or agents. It utilises graph theory and network analysis techniques to map and analyse the interactions and information flow among the network's members Home Office (2016). SNA complements systems thinking by enhancing understanding and analysing complex social systems and networks, their behaviours, and their potential for positive social impact. In water management, SNA can be a very helpful tool to understand the information and resource flow between actors which is very crucial in improving communication on water challenges and initiatives to address them. SNA also help stakeholders to understand the power dynamics between them. | Environment, Health, Sustainability | Allen and Kilvington n.d.; Bryan Lindsley 2022; Swiss Tropical and Public Health Institute n.d. |
|  | System Map | A system map is an essential tool for representing the structure and interactions within a system. It is the simplest method commonly applied to visualise elements (agents/components/parts) and their connections or interrelations within a single frame (Acaroglu 2017). Each element is represented in a different circle. Line (with or without direction) is inserted to connect the circles that have relationships or influences on one another. Circles within a system boundary can be grouped into an area with a line or dotted line (if the boundary is not very clear) (Burge Hughes Walsh n.d.; Government Office for Science 2022). System mapping has also been extended to different versions of mapping exercises which are more detailed, among others the context map, concept map, mapping and causal loop diagram as described below (Acaroglu 2017).    Adapted from Acaroglu (2017) | Systems Engineering, Management, Health, Social | Burge Hughes Walsh n.d.; Government Office for Science 2022 |
|  | Context Map/ Diagram | Context Map or Context Diagram provides a visual representation of the context of a problem or situation. It shows the different elements that are involved in the problem, as well as the relationships between these elements. Context map is hierarchical and often used in the early stages of problem-solving, to help identify the key issues and to develop a better understanding of the problem. It also shows the system as a single central entity and the external actors or elements that interact with the system. It however does not necessarily require information about the connections or interrelations between different contexts included in the map (Burge Hughes Walsh n.d.). The context map is valuable in helping stakeholders understand the system's interfaces or dependencies with external entities. In water management, a context map can be very useful to gain information about water systems or their challenges from different contexts such as ecosystem services, different water users, infrastructure, water governance etc. and illustrates the relationships and interactions between different elements and contexts such as the flows of water between sources and users, the impact of human activities on water quality, and the influence of policies and regulations on water management practices. Context map appreciates input from individuals or a group’s personal experiences, knowledge and feelings about the situation or problem posed to them. Nevertheless, by providing a holistic view of the water system, the map assists in making informed decisions that consider the broader implications and interconnectedness of water-related actions. | Public Policy, Environment | Burge Hughes Walsh n.d.; Government Office for Science 2022 |
|  | Concept Map | A concept map is used to visually represent and explore complex ideas, relationships, and structures of a complex system. In water management for instance, it can help visualise the connection between different concepts (e.g., water sources, water infrastructure, water quality, water usage, water conservation and water governance), ideas or information using arrows or lines with or without direction, using mental models. It starts with selecting a concept or system and dissecting it into individual topics and relationships (Allen and Kilvington 2018). The central concept, for example, water security is placed at the centre of the map, representing the main theme. It may look something like a brainstorming session that explores, dissects and organises a topic into smaller relationships (Mahaffy et al. 2019). The maps can support stakeholders in gaining a deeper understanding of the subject, identifying areas for further exploration, and making more informed decisions for effective and sustainable water management practices. are used to represent the relationships between concepts. | Public Policy, Environment, Sustainability | Allen and Kilvington n.d. |
|  | Causal Loop Diagram (CLD) | CLD is a visual tool that helps depict the causal relationships and feedback loops of variables or elements within a system using arrows with positive and negative reinforcement, which describe system growths and declines. ﻿It depicts feedback processes, which are present in most systems and are also the building block of Systems Dynamic Modelling (SDM) (Phan et al. 2021). Causal loop diagrams are powerful tools for exploring and understanding the behaviour of water management systems, providing insights into the complexities and interactions between different elements (Ram and Irfan 2021). They support a holistic and dynamic approach to water management, guiding decision-makers in developing more effective and sustainable strategies. | Systems Engineering, Environment, Health, Sustainability | Allen and Kilvington n.d.; Bryan Lindsley 2022; David Peter Stroh 2015; DEFRA 2022; Government Office for Science 2022; Kim 2000; Monat and Gannon 2015; Swiss Tropical and Public Health Institute n.d. |
|  | Systemigram | Systemigram is a method used in the ﻿Boardman Soft Systems Methodology to ﻿identify the key elements of a formal system model with attention to parts, relationships, wholes, emergence, flows, inputs, outputs, transformations, processes, and networks of the entire system (Sauser et al. 2020; Squires et al. 2010). It helps engage stakeholders for constructive dialogue and designing solutions based on the understanding about systems complexities regardless of systems owners or boundaries (Sauser et al. 2020). A systemigram is created by first, identifying the system of interest and its objective/purpose. Subsequently, nodes are created (nouns) and connected through arrows (input and output) which should carry a story of how the two nodes are related. No repetition of nodes happens in a systemigram. A systemigram can be coloured to make it easier to tell a story about a complex system using systemigram (Squires et al. (2010). In water management, systemigrams can be useful for understanding the flow of water through a watershed, for instance, in the case of water pollution, it can capture the sources of water pollution in a watershed (e.g.: industrial wastage, agricultural runoff, and sewage discharge), processes involved (e.g.: pollutants are transformed through industrial processes, agricultural practices, and human activities) and their potential impacts (eutrophication, waterborne diseases, and habitat loss). The diagram developed can be used to communicate complex water management issues to the stakeholders and help them explore the potential impacts of different water management interventions. | Public Policy, Social | Monat and Gannon 2015 |
|  | (Fuzzy) Cognitive Mapping (FCM) | This method is a hybrid of fuzzy logic and cognitive mapping. It models individuals’ mental representations of a system or problem. FCM involves identifying and representing the causal relationships between various concepts or elements within the system, as perceived by the stakeholders or participants (Kok 2009). The term “fuzzy” refers to the possibility of representing uncertain or imprecise relationships in the model. The fuzzy graph is used to represent causal reasoning in the form of nodes (representing elements) and weighted edges between them. The arrows link each node with phrases like “increases”, “causes”, or “is a part of”. Some Fuzzy Cognitive maps use arrows with positive or negative numbers to represent the strength of influence one element has on the other (Kok 2009). It is a valuable tool for water management, especially in situations where uncertainty, multiple perspectives, and complexity are involved. By engaging stakeholders in the mapping process, the approach ensures that diverse knowledge and experiences are considered, leading to more context-specific and robust water management strategies. It fosters communication, understanding, and ownership among stakeholders, enhancing the effectiveness and sustainability of water management initiatives. | Social | Bryan Lindsley 2022 |
|  | Participatory Modelling | Participatory modelling is a powerful tool to develop an understanding of complex systems collaboratively and inclusively. It usually starts with developing CLD to co-design computerised models using information gained from stakeholders (Coletta et al. 2021; Pluchinotta et al. 2018). Data relevant to the modelling exercise are collected from various sources, including stakeholders' knowledge, historical records, and scientific studies. However, stakeholders play a critical role not only in data collection but also in validating them (Pluchinotta et al. 2021). In water management, the processes can bring together diverse perspectives, knowledge, and experiences to construct a shared understanding of the water system's components, interactions, and feedback loops which contributes to more robust models. In this process, the participants co-formulate the problem and use modelling practices to aid in the description, solution, and decision-making actions of the group. It can also be a useful social learning tool that involves engaging individuals, groups, or organisations, in the co-creation of a visual representation of a complex system. As stakeholders are actively involved in the modelling process, they develop a sense of ownership over the results. This can lead to better implementation of management strategies and policies that are aligned with stakeholders' needs and preferences. | Environment, Public Policy | David Peter Stroh 2015 |
|  | Systems Archetypes | Systems Archetypes are recurring patterns of behaviour and structure that arise in systems due to common underlying dynamics. They were originally introduced by Peter Senge and his colleagues in "The Fifth Discipline," a seminal book on Systems Thinking by Senge (Senge 1997). Systems Archetypes help identify and understand the root causes of problems and behaviours in systems and offer insights into potential interventions to improve system performance. Based on CLD developed, different interactions between elements/parts/variables can be classified into different types to help enhance understanding of the dynamic behaviour of a system which is the ‘Drifting Goals’, ‘Shifting the Burden’, ‘Limits to Success’, ‘Success to the Successful’, ‘Fixes that Fail’, ‘Tragedy of the Commons’, ‘Growth and Underinvestment’, ‘and Escalation’ (D. H. Kim 2000; Senge 1997). By recognizing these archetypal patterns, water management stakeholders can better understand the system's behaviour and identify effective interventions to address challenges. Shifting the Burden, for instance, reflects that a problem is temporarily solved using a quick fix that provides immediate relief but does not address the root cause. For example, building new water infrastructure to meet increasing demand without considering water conservation measures can lead to increased dependence on expensive and resource-intensive solutions. While the Tragedy of the Commons can help explain the situation whereby multiple users exploit a shared water resource without adequate regulations or cooperation resulting, in water resources being overused and degraded, negatively impacting all users in the long run. | Systems Engineering, Environment, Social, Sustainability | Allen and Kilvington n.d.; David Peter Stroh 2015; Kim 2000; Monat and Gannon 2015 |
|  | Stock and Flow Analysis (SFA) | SFA focuses on the accumulation of resources or quantities (stocks) and their movement or transfer (flows) within a system. It helps to visualize and analyse how the levels of stocks change over time due to the inflows and outflows, and how feedback loops and delays affect the system's behaviour. It is an SDM method used to interpret the dynamism of a system’s behaviour using quantified data of stock and flow, with CLD as the first reference point (Aronson and Daniel Angelakis n.d.; Kim 2000). It provides a valuable tool to study the dynamics of water resources, such as water availability, water storage, water usage, and water quality (Phan et al. 2021). The insight gained from SFA supports a more holistic understanding of the complex interactions and dynamics within the water system, guiding decision-makers towards resilient and adaptive water management solutions. | Systems Engineering, Environment, Sustainability | Bryan Lindsley 2022; Government Office for Science 2022; Monat and Gannon 2015 |
|  | Behaviour Over Time (BOT) Graph | A BOT graph is a time-series graph that illustrates the behaviour of one or more variables in a system over a specific period. It is a useful tool to observe and analyse the trends, patterns, and fluctuations in variables, which can provide insights into the system's behaviour and dynamics (Bryan Lindsley 2022; Kim 2000). BOT graphs typically plot time on the horizontal axis and the variable values on the vertical axis. BOT graphs can be used to analyse and monitor various aspects of water resources, water quality, water usage, and other relevant variables to gain valuable insights into the dynamic behaviour of water systems and make data-driven decisions to optimize water resources, ensure water quality, and address water-related challenges effectively. | Systems Engineering, Environment, Public Policy, Sustainability | Allen and Kilvington n.d.; Bryan Lindsley 2022; Government Office for Science 2022; Kim 2000; Monat and Gannon 2015 |
|  | Graphical Function Diagramme (GFD) | GFD is a graphical representation that illustrates the functions and flows of matter, energy, or information within a system. It is commonly used in engineering, process analysis, and systems modelling to understand the sequence of processes, transformations, and interactions that occur within the system (Bryan Lindsley 2022). It captures how one variable affects another, by plotting the relationship between the two over the full range of relevant values (Kim 2000). It is useful for clarifying nonlinear relationships between variables. By using GFD in water management, stakeholders can gain a comprehensive understanding of the functional relationships and interactions within the water system such as water infrastructure, or resource management. This understanding is crucial for effective planning, optimization, and decision-making, leading to more efficient and sustainable water management practices. | Systems Engineering, Environment, Sustainability | Bryan Lindsley 2022; Kim 2000 |
|  | Design Structure Matrix (DSM) | DSM is a square matrix with an equal number of rows and columns showing relationships between elements/variables in a complex system. To develop DSM, after determining the system of interest, using information gathered through document analysis, interviews or surveys, the system will be decomposed carefully into a comprehensive set of meaningful system elements, followed by identifying their relationships and putting them into a matrix (Browning 2016). The components will be rearranged to provide a better illustration of their interactions (see illustration). In the context of water management, DSM can be applied to understand the interactions between different elements or activities involved in water-related projects, infrastructure development, or system design. This understanding is crucial for effective project planning, coordination, and risk management, leading to successful water management initiatives and infrastructure development.   |  | COMPONENT | | | | | | | | | | | --- | --- | --- | --- | --- | --- | --- | --- | --- | --- | --- | | COMPONENT |  | X | X | X |  |  |  |  | X | X | | X |  | X |  |  |  |  |  |  | X | |  | X |  | X |  |  |  |  | X | X | | X |  | X |  |  |  |  |  | X |  | |  |  |  |  |  | X |  |  |  | X | |  |  |  |  | X |  | X |  | X |  | |  |  |  |  | X | X |  |  | X |  | |  |  |  |  |  |  |  |  |  |  | |  | X |  |  | X | X |  |  |  | X | | X |  | X |  |  |  | X |  | X |  | | Systems Engineering | Chatzimichailidou and Whyte 2018 |
|  | N2 Matrix/ Systems Interrelationship Matrix (SIM) | ﻿N2 Matrix or Systems Interrelationship Matrix is a variant of the DSM, used to represent and analyse interdependencies between elements or components in a complex system or project based on input and output (Burge Hughes Walsh n.d.; Chatzimichailidou and Whyte 2018). Inputs are shown vertically in columns and outputs are shown horizontally in rows (left or right). External inputs and outputs are also reflected through arrows going in and out of the matrix (Burge 2011). The strength or intensity of the interactions can be quantified or represented using numerical values, or it can be qualitatively indicated with symbols to denote different levels of interaction. It helps to visualize how changes in one element can affect other elements in the system. In water management for instance, after identifying the key components or factors that are relevant to the specific water system being analysed such as water sources, water users, infrastructure, water quality parameters, climate factors, and policy and governance elements, pair of components, stakeholders and relationships between theme will be identified and marked using symbols or numbers to indicate the strength and direction of the relationships, before inserted into a matrix. It helps to identify critical components that have a significant influence on other components or are highly affected by changes in other parts of the system. It is also useful for scenario analysis, where stakeholders can assess the potential impacts of different actions or policy interventions. By modifying the relationships in the matrix, stakeholders can explore how changes in one component may lead to cascading effects on the entire water management system. It may also facilitate the development of more holistic and integrated water management strategies that consider the trade-offs and synergies between different aspects of water resources management. | Systems Engineering | Burge Hughes Walsh n.d.; Chatzimichailidou and Whyte 2018 |
|  | Petri Net | Developed by Carl Adam Petri, Petri Net is a graphical tool for the description and analysis of concurrent processes, and state-transition, which arise in systems with many components used in mathematical models governing systems. It offers a clear and visual representation of system behaviour, making it a powerful tool for system modelling, analysis, and verification (Narahari 1999). They provide insights into the dynamic behaviour of concurrent systems and aid in identifying and resolving potential issues and inefficiencies. The components of Petri Net are places, transitions, input and output (represented by token) (Murata 1989). The relationships between places and transitions are established by directed arcs, which indicate the flow of tokens from places to transitions or from transitions to places. Each transition has input arcs and output arcs, specifying the conditions under which a transition can fire (occur) Murata (1989). In the context of water management, Petri nets can be applied to model and study the dynamics of water-related processes, such as water flow, water distribution, and resource management. For instance, Petri Net can help model the allocation of water resources among different users or sectors. This includes modelling the decision-making process for water allocation and how changes in demand or availability impact the distribution of water. | Systems Engineering | Chatzimichailidou and Whyte 2018 |
|  | Backcasting | Backcasting is a future-based planning method using desirable visions of the future as the starting point, and pathways to achieve the vision from the present are then explored (Dreborg 1996). It is different from forecasting which uses current knowledge and trends to predict what will happen in the future, while backcasting starts by envisioning the future, and asking what actions must be taken to get there (Leung 2016). It is particularly useful in situations where a more sustainable, resilient, or transformative approach is needed to address complex water management challenges (Quist 2007). In backcasting, stakeholders, including water users, communities, experts, and policymakers, collaborate to define a vision which is ambitious, yet realistic, and aligned with the long-term goals of sustainable water management. By working backwards from a shared vision, stakeholders can develop a more transformative and sustainable pathway to address water challenges and create a more resilient and desirable future for water resources and ecosystems.    Adapted from Leung (2016) | Environment | Bibri 2018; Quist 2007; Voulvoulis et al. 2022 |
|  | Appreciative Inquiry (AI) | AI is a method that focuses on identifying and building upon an organization's strengths, successes, and positive attributes rather than solely focusing on its problems or deficiencies. AI aims to create a positive and constructive environment that fosters collaboration, creativity, and innovation by changing their conversation towards doing more of what has been working for them rather than working on solving problems or overcoming weaknesses (Bryan Lindsley 2022; Christie 2006). ‘4D cycle’ questions premised on the definition of a mutually agreed affirmative topic are asked during the research- discovery (explore the best of ‘what is’), dream (collaboratively visioning, debating and articulating on ‘what might be’), design (working together to develop ‘what might be’) and destiny (collaboratively experiment ‘what can be’) (Mishra and Bhatnagar 2012). AI can be adapted for water management to foster a collaborative and positive approach to addressing water-related challenges by shifting the focus to explore and amplify the positive aspects of water management within a community or organisation which include recognising successful water conservation efforts, innovative water reuse practices, or effective community engagement. Appreciative interviews and dialogues in AI can elicit stories and experiences of positive moments related to water management to uncover successful practices, innovative ideas, and inspiring initiatives that can serve as models for future improvement. Stakeholders can co-create a shared vision for water management based on their positive experiences and aspirations. This vision becomes a guiding force for shaping future water management strategies and projects. | Environment, Public Policy | Bryan Lindsley 2022 |
|  | V Diagram or V Model | V Diagram or V Model is a method used to illustrate the relationship between each phase of the development lifecycle and its associated testing phase. It emphasises the importance of testing at each stage of the development process, with testing phases mirroring the development phases on the left side of the "V". The right side of the "V" represents the corresponding testing phases for each development step (Childs 2019). Even though it is common in systems engineering (Chatzimichailidou and Whyte 2018), by adopting the V Model for water management projects, stakeholders can ensure a systematic and well-structured approach, starting from the early stages of requirements definition and proceeding through design, implementation, testing, and operations. This can lead to more successful and sustainable water management projects with reduced risks of errors or inefficiencies.    Adapted from Childs (2019) | Systems Engineering | Chatzimichailidou and Whyte 2018 |
|  | Driver-Pressure-State-Impact-Response (DPSIR) | DPSIR is applied to investigate problems by understanding the causal-effect relationship between elements involved in a system or the consequential implication of events that lead to problems in a structured way. Investigation begins from the upstream levels which is the driver, followed by pressure created by the driver on site leading to impacts and subsequently response arises upon the impact experienced (Kristensen 2004). In water management, it helps policymakers, water managers, and researchers gain a holistic understanding of the complex relationships between human activities and the environment, to develop more effective strategies for water resources conservation and protection for sustainable development (Gregory et al. 2013). DPSIR can help identify the root causes of water-related issues, evaluate the effectiveness of existing responses, and design more targeted and integrated solutions to address water challenges and achieve sustainable water management.    Adapted from Kristensen (2004) | Environment | Gregory et al. 2013 |
|  | Root Cause Analysis (RCA) | RCA is a problem-solving methodology using a wide range of tools, approaches and techniques (e.g. such as Fishbone Diagrams (Ishikawa Diagrams), Fault Tree Analysis, and Pareto Analysis) to identify the underlying or fundamental cause of an issue or problem rather than just addressing its symptoms(Jayswal et al. 2011; Rooney and Vanden Hauvel 2004). The goal of RCA is to determine why the problem occurred in the first place to prevent its recurrence in the future. The process of conducting a root cause analysis typically involves seven steps- define the problem, collect data, identify possible causes, analyse, and prioritise causes, verify root causes, develop corrective measures, and monitor and evaluate. It is a valuable tool in water management, as it helps to move beyond reactive approaches and address the core issues affecting water resources (Jayswal et al. 2011). By understanding the root causes, water managers can develop sustainable and effective solutions that lead to improved water quality, availability, and equitable distribution. Unequal access to water resources among different communities or regions for instance may be rooted in socioeconomic disparities leading to unequal bargaining power in water allocation decisions. The effectiveness of RCA is highly dependent on the quality of data collected and the expertise of the individuals involved in the analysis process. RCA should not be a one-time event but a continuous improvement process to enhance water management and prevent recurrent issues. It can help build a culture of learning and improvement among the stakeholders in the water system.Top of FormBottom of Form | Environment | Bryan Lindsley 2022; Monat and Gannon 2015 |
|  | Enablers and Inhibitors | Identifying the enablers and inhibitors that cause the system to behave as it does, and drawing upon the evidence, stories and data to help understand the causes of the problem is important in steering systemic changes. An enabler is a significant force in the environment that supports or increases the likelihood that the system will deliver the desired outcome while an inhibitor undermines or prevents the system from creating it. In water management, enablers and inhibitors can include people, behaviours, organisations, technology, financial resources, trends and events, norms, beliefs, phenomena, institutions, laws, policies, etc (Government Office for Science 2022). For instance, access to reliable and up-to-date data on water resources, usage, and quality enables evidence-based decision-making and effective planning for sustainable water management. Whereas poorly maintained water infrastructure can lead to water losses and inefficiencies and hinder the effective distribution of water resources. Identifying enablers or inhibitors for sustainable water systems requires a comprehensive and integrated approach, involving multiple stakeholders, to overcome challenges and work towards the goal. | Public Policy | Government Office for Science 2022 |
|  | Systems Dynamic Modelling (SDM) | SDM is a computerised model based on CLD, feedback loops and SFD that helps to understand the dynamic interrelationships between various components within a system and how these interactions lead to system behaviour. Providing insights into the long-term consequences of various decisions helps in making more informed and sustainable choices for complex systems (Phan et al. 2021). In water management, SDM can be used to study the balance between water supply and demand by considering factors such as population growth, agricultural needs, industrial water use, and climate variability, and used to model to identify potential water shortages or excesses and assess the effectiveness of demand management strategies (Phan et al. 2021; Zare et al. 2019). By considering the interactions between various water-related sectors (e.g., agriculture, industry, environment), SDM can identify potential trade-offs and synergies for better resource allocation. Decision-makers can also simulate the long-term consequences of building new dams, water treatment facilities, or water distribution networks. | Systems Engineering, Environment, Health, Sustainability | Allen and Kilvington n.d.; Bryan Lindsley 2022; Chatzimichailidou and Whyte 2018; DEFRA 2022; Jackson 2019; Monat and Gannon 2015; Swiss Tropical and Public Health Institute n.d. |
|  | Agent-Based Modelling (ABM) | ABM is a computational modelling technique used to describe complex systems through decisions/actions of a variety of social actors or agents within a simulated complex and dynamic social and biophysical environment. Each agent is an autonomous entity that follows certain rules and behaviours, and their interactions with other agents and the environment drive the emergent behaviour of the entire system (Heath and Hill 2010; Huber et al. 2018). Three basic ABM elements, namely, agents (active reactive autonomous/ heterogeneous independent individuals, an environment (where the agents are part of and coexist with other agents) and rules (how agents interact with other agents and the environment) (Badham et al. 2018). ABM offers a powerful approach to studying complex water-related problems, considering the interactions between various stakeholders such as farmers, industries, households, entities such as government agencies and water companies, and other factors such as climate change involved in water resources management (Berglund 2015). It can also model how their decisions result in the aggregate or system-wide behaviour of water systems. | Environment, Social Sciences | Bryan Lindsley 2022; DEFRA 2022 |
|  | Bayesian Belief Network (BBN) | Also known as the Probabilistic Graphical Model, BBN is a probabilistic modelling technique used to represent and reason about uncertainty and complex relationships between variables. It provides a graphical and mathematical framework for making inferences and predictions in uncertain environments based on the likelihood of cause-and-effect interactions between random variables or actors(Phan et al. 2016; Richards et al. 2013). In a BBN, variables are represented as nodes in a directed acyclic graph. The edges between nodes represent probabilistic dependencies or causal relationships. Each node in the graph is associated with a conditional probability distribution that quantifies the probability of the node given its parents (nodes that directly influence it). BBN is useful to model complex water systems, incorporating various hydrological, climatic, and environmental variables. These models can help simulate the behaviour of the water system, predict water availability, and assess the impacts of different factors on water resources. By integrating data from various sources, BBN can provide probabilistic assessments of the likelihood and consequences of different risk scenarios, aiding in the development of risk management strategies to deal with floods, droughts or water quality issues. | Environment, Social Sciences, Sustainability | Allen and Kilvington n.d.; Bryan Lindsley 2022; DEFRA 2022 |
|  | Multicriteria (Decision) Analysis (MCA) | MCA is a decision-making approach that helps evaluate and compare alternatives based on multiple criteria or objectives that need to be considered simultaneously. For water management projects for instance, MCA provides a structured and transparent approach to decision-making, allows stakeholders to consider multiple dimensions of a problem, avoids potential biases, and makes more informed choices (Psomas et al. 2018). Additionally, MCA promotes stakeholder engagement and collaboration by offering a platform for dialogue and negotiation among different parties with diverse interests and perspectives on water resources and services. MCA can be implemented using various techniques, including simple scoring methods, weighted sum models, and more advanced mathematical approaches like the Analytic Hierarchy Process (AHP), Analytic Network Process (ANP), and ELECTRE (Elimination and Choice Expressing Reality)(Abdullah et al. 2021). | Environment, Public Policy | DEFRA 2022 |
|  | Leverage Point | The method to identify leverage points involves the analysis of a complex system to look for areas of leverage and possible areas for interventions. Leverage is a phenomenon where a small effort results in an outsized impact (Fischer and Riechers 2019). Intervention at the leverage points in a system can result in wider ripple effects that ultimately help the system to change itself allowing for a big impact on the system with comparatively modest effort or investment (Meadows 1999). When applied to water management, the leverage point method helps identify key areas where targeted actions can lead to substantial improvements in water resource management, sustainability, and overall effectiveness of water-related initiatives (Nguyen and Bosch 2013; WWAP et al. 2019). Some leverage points discussed among water communities are water pricing strategies to reduce consumption, investment to develop water infrastructure to improve accessibility to water services and engaging stakeholders to enhance their sense of ownership towards water resources and the environment, steering their behavioural change towards sustainability. Identifying leverage points in water management requires a thorough understanding of the specific water challenges, context, and stakeholder dynamics. It involves engaging relevant stakeholders to identify and prioritize the most promising leverage points for intervention. | Environment, Public Policy, Sustainability | Government Office for Science 2022 |
|  | Evidence Synthesis or Expert Elicitation | Evidence synthesis can be used to identify gaps in knowledge, establish the evidence base for best-practice guidance, or help inform policymakers and practitioners. All relevant information can be brought together to answer research questions (Government Office for Science 2022). Different techniques include content analysis, review, scoping review, meta-analysis etc. | Public Policy, Environment | Government Office for Science 2022 |
|  | Theory of Change (TOC) Map | The TOC Map is a visual representation of the logic and underlying assumptions that guide the planning, implementation, and evaluation of sustainability interventions and programmes of measures. It depicts the cause-and-effect relationships between the programme's activities, intended outcomes, and the ultimate impact it aims to achieve to help stakeholders understand the pathway of change and the crucial assumptions that need to hold true for the programme to be successful (Allen and Kilvington 2018; Government Office for Science 2022). Its key components are inputs or resources, activities, outputs, short-term, intermediate outcomes and long-term outcomes and impact (Bryan Lindsley 2022). For example, during planning, we assume that if we can improve water monitoring and data collection systems, leading to a better understanding of water quality changes in rivers, lakes, and groundwater, we can take actions to be able to eventually make the availability of clean and safe drinking water more sustainable. TOC maps can help stakeholders review and update sustainability strategies to adapt to changing circumstances (e.g.: water monitoring and data collection systems have not been adequate to capture the evolution of the system) and to validate the assumptions made during planning so appropriate adjustments can be made to avoid diverting from the pathways towards sustainability. | Public Policy, Health | Allen and Kilvington n.d.; Bryan Lindsley 2022; Government Office for Science 2022; Swiss Tropical and Public Health Institute n.d. |
|  | System performance questions | System performance question applies a whole systems perspective to evaluate the efficiency, effectiveness, and overall functioning of a system by understanding what works, where it is working, why it is working and for whom, to plan further changes to ensure we are on the right pathways towards the objective/vision established (Government Office for Science 2022). In achieving the sustainability goal of an urban water system for instance, these questions offer a great opportunity for stakeholders to gain insights into how well the existing water management strategies or policies meet the objectives, identify areas for improvement, and understand the factors that contribute to their success or limitations. | Public Policy | Government Office for Science 2022 |

**Research Question 1:**

How do system tools work?

**Thematic Analysis:**

**Step 1,** Familiarisation with data: skim documents to identify system tools, their functions and the field of application

**Step 2,** Searching the theme: sort out the data to the potential themes, collecting all the data related to any possible theme (9 themes identified)

**Step 3,** Reviewing tools: review brief descriptions of each tool provided in the documents and identify the field of application.

**Step 4,** Revising the themes: review the themes based on the description of tools (revised into 10 themes)

**Step 5,** Selecting tools: revisit the tools and their function to be selected and included in the final report. Guided by the criteria to select systems that are fundamental or integral to the practice of systems thinking by Monat and Gannon (2015), 38 tools have been selected for mapping. At this stage, researchers added another 2 tools which are commonly used in systems research for sustainability, making it 40 tools (Table 1)

**Step 6,** Mapping: map 40 selected tools into 10 themes. Tools can be mapped into more than one theme according to their functions

**Step 7,** Defining and naming the themes: continuous analysis for defining the features and establishing a clear description of each theme to finalise the name. At this stage, we change the ‘theme’ into ‘type’

**Step 8,** Reporting: preparing final analysis abstracted from the data, connecting the analysis to the study question and existing evidence (Table 2)

**Table 2: Type of system tools based on their functions and applications** *(related to the first part of the Result section)*

| **Type** | **System Tools** |
| --- | --- |
| **Type:** Brainstorming  **Description:** Collect and gather information about complex situations and problems from different perspectives, dimensions, disciplines, scales etc. as important steps in exploring effective solutions | Rich Pictures (mind map); Pig Model ; CATWOE ; Double QQ Diagram (quantile-quantile plot) Soft Systems Methodology (SSM); Critical System Heuristic (CSH); Viable System Model (VSM); Vanguard Method (VM) ;Cynefin |
| **Type:** Identify actors or agents  **Description:** Tools to determine stakeholders that are directly and indirectly affected by the systems. They are also often referred to as actors or agents | Stakeholder (Influence) map/ Actor map; Stakeholder Analysis; Social Network Analysis (SNA) |
| **Type:** Facilitate communication among stakeholders  **Description:** Tools to facilitate effective communication and discussion or learning about problems or complex situations with stakeholders, to attain understanding and collaborate towards the shared vision | Participatory Mapping/ Modelling; Systemigram; SSM; Pig Model |
| **Type:** Visualise a system  **Description:** Tools that help stakeholders think about a complex situation or problem from a systems perspective by understanding the interrelationships between parts, elements, or agents within a complex system | Concept Map; System Map; Context Map/ Diagram; (Fuzzy) Cognitive Mapping; Systemigram |
| **Type:** Understand behaviour  **Description:** Tools that utilise information and data to describe how a complex system behaves or to understand patterns | Causal Loop Diagram; Systems Archetype; Stock and Flow Analysis; Behaviour Over Time Graph; Graphical Function Diagramme; Design Structure Matrix; Evidence Synthesis or Expert Elicitation; N2 Matrix; Petri Net |
| **Type:** Set objectives  **Description:** Tools used to develop visions or goals to be achieved from interventions made on the problems or issues. | Backcasting; Appreciative Inquiry; V Diagram; Rich Picture; Pig Model |
| **Type:** Investigate causes  **Description:** Tools for investigating the root causes of problems to identify effective interventions. | Driver-Pressure-State-Impact-Response; Root Cause Analysis; Enablers and Inhibitors |
| **Type:** Computer modelling  **Description:** Tools that apply information and data to simulate the system’s behaviour through mathematical or computer modelling | Systems Dynamic Modelling (SDM); Agent-Based Modelling (ABM); Bayesian Belief Network (BBN); SNA, Petri Net |
| **Type:** Evaluate alternatives  **Description:** Tools for exploring potential solutions or interventions and evaluating alternatives to make the best decision to address problems based on selected objectives | Multicriteria Analysis; Leverage Point; Theory of Change Map; SSM, CSH; VM; VSM; Enablers and Inhibitors |
| **Type:** Monitor and evaluate  **Description:** Tools to understand what works, where it is working, why it is working, for whom, etc. when monitoring the implementation | System performance questions; Theory of Change Map |

**Research Question 2:**

How they have been applied in water-related studies?

**Thematic Analysis:**

**Step 1,** Familiarisation with data: skim documents to identify research objectives, methods used and their purpose in achieving the objectives

**Step 2,** Sorting: sorting out the system tools used into main or additional/ complementary

**Step 3,** Searching the theme: reviewing the application of main tools in the study based on potential type, referring to the list of the types listed from the result of question 1

**Step 4,** Mapping: mapping the tools applied into 10 types. Each tool in the study can be mapped into more than one type. Application of tools that do not fall under the 10 types can be put under the ‘others’ type.

**Step 5,** Reporting: preparing final analysis abstracted from the data, connecting the analysis to the study question and existing evidence (Table 3)

**Table 3: Application of system tools in water-related studies** *(related to the second part of the Result section)*

| **Main Tool** | **Ref** | **Objective of Study** | **Other Tools Used** | **Brainstorm** | **Identify Actors and Agents** | **Facilitate Communication Among Stakeholders** | **Visualise A System** | **Set Objectives** | **Understand Behaviour** | **Investigate Causes** | **Computer Modelling** | **Evaluate Alternatives** | **Monitor and Evaluate** | **Others** |
| --- | --- | --- | --- | --- | --- | --- | --- | --- | --- | --- | --- | --- | --- | --- |
| **SSM** | Saeedi et al. 2022 | Understand stakeholders’ perception of green infrastructure to manage urban runoff in Tehran | ﻿In‐depth interview, questionnaire, Rich Picture, CATWOE, ﻿Root Definition, Interpretive structural modelling | ***** |  |  | ***** |  |  | ***** |  | ***** |  |  |
|  | Markowska et al. 2020 | Addressing wicked problems faced by the management of a reservoir | Document analysis, fieldwork, interview, ﻿10 Steps Planning Processing, CLD | ***** |  |  | ***** |  |  | ***** |  | ***** |  |  |
|  | Suriya and Mudgal 2013 | Understand complex situations to develop a problem-solving strategy for flood management in Chennai, India | Rich Picture, CATWOE, Root Definition Stakeholder workshop, Pairwise Ranking, Force Field Analysis | ***** |  | ***** |  |  |  | ***** |  | ***** |  |  |
|  | Bunch 2003 | ﻿Support rehabilitation and management of the Cooum River and the environment in Chennai, India | Rich Picture, CATWOE, Root Definition | ***** |  | ***** |  | ***** |  | ***** |  | ***** |  |  |
| **Backcasting** | D’Agostino et al. 2020 | Improve local agriculture water management policy and practice in Malta | Multi-stakeholder Analysis, Delphi Analysis, FCM, Questionnaire | ***** |  | ***** |  | ***** |  | ***** |  | ***** |  |  |
| **SDM** | Joshi et al. 2020 | ﻿Evaluate future supply and demand scenarios in ﻿Las Vegas Valley based on the climate and hydrological projections using the simulation period | Conceptual model, data synthesis |  |  |  |  |  |  |  | ***** |  |  |  |
|  | Kotir et al. 2016 | Examine the feedback processes and interaction between the population, the water resource, and the agricultural production sub-sectors in Ghana | ﻿Participatory workshop, CLD, SFD, ﻿Sensitivity analysis |  |  |  |  |  |  |  | ***** |  |  |  |
|  | Pagano et al. 2019 | ﻿Develop a participatory System Dynamic Model to quantitatively assess the effectiveness of nature-based solutions to deal with flood risks while producing other co-benefits for sustainability in ﻿the Glinščica river | ﻿Fuzzy Cognitive Maps (FCM), ﻿Interviews, Stakeholder workshop, Stock and Flow Model, Scenario Building and Analysis Ambiguity Analysis | ***** |  | ***** | ***** |  | ***** |  | ***** |  |  |  |
|  | Pluchinotta et al. 2021 | ﻿Develop stakeholders’ understanding of the interdependencies with the urban water management system and explore future urban water management options in ﻿Ebbsfleet Garden City, UK | Stakeholder workshop, CLD, Scenario Building and Analysis | ***** |  | ***** | ***** |  | ***** |  | ***** |  |  |  |
| **ABM** | Rojas et al. 2022 | ﻿Develop and deploy a digital platform supporting decision-making for water management in a semiarid basin under contentious water use | Participatory workshops, surveys |  |  |  |  |  | ***** |  | ***** | ***** |  |  |
|  | Koutiva and Makropoulos 2019 | Simulate the water demand behaviour of households and how it is influenced by water demand management strategies and drought conditions in Athens, Greek | Data analysis, scenario building and analysis |  |  |  |  |  | ***** |  | ***** | ***** |  |  |
|  | Kandiah et al. 2019 | ﻿Simulate and project adoption of water reuse by consumers for the Town of Cary, North Carolina | Data synthesis |  |  |  |  |  | ***** |  | ***** |  |  |  |
|  | Shelton et al. 2018 | Develop a role-model game with stakeholders on how to protect their households against scarcity and flooding- to ﻿validate assumptions, validate the model with community members | - |  |  | ***** |  |  |  |  |  |  |  |  |
|  | Castonguay et al. 2018 | Explore and simulate the decision-making and interactions of two types of agents: a regulator and households﻿ in the adoption of rainwater tanks in ﻿a suburb of Melbourn, Australia by integrating economic and environmental factors | - |  |  |  |  |  | ***** |  | ***** | ***** |  |  |
|  | Pouladi et al. 2020 | ﻿Develop a hybrid socio-hydrological framework to provide future insights for policy-makers based on farmer's decisions | ﻿Socio-hydrological model, data mining, interviews, surveys |  |  |  | ***** |  | ***** |  |  |  |  |  |
| **BBN** | Pagano et al. 2018 | Develop a model for vulnerability assessment, impact assessment and related uncertainty assessment for emergency management of drinking water supply systems in ﻿L’Aquila province, Italy | - |  |  |  |  |  |  |  | ***** |  |  |  |
|  | Kabir et al. 2015 | Evaluate the risks of failures of different types of water mains in ﻿the City of Kelowna, Canada | ﻿Detailed literature review, GIS mapping |  |  |  |  |  |  |  | ***** | ***** |  |  |
|  | Singto et al. 2020 | Elicit and discuss local stakeholders’ concerns in conflicts over water resource planning through the development of a dam ﻿in Nakhon Si Thammarat province, Southern Thailand | Document analysis, participatory workshop, CPT, sensitivity analysis | ***** |  | ***** | ***** |  | ***** |  |  | ***** |  |  |
| **SNA** | Nabiafjadi et al. 2021 | ﻿Determine entities involved in water governance in the Zayandeh-Rud basin and their roles, and describe and analyze the collaborative pattern of knowledge and information exchange in the basin. | Interview, ﻿archival research |  | ***** |  |  |  | ***** |  |  |  |  |  |
|  | Deng et al. 2021 | Explore ﻿the characteristics of virtual water trade networks | Data analysis |  | * |  |  |  |  |  |  |  |  |  |
| **MCA/MCDA** | Hassan et al. 2019 | Analyse ﻿accords, treaties, and water policies in the region to assess the relationship of water security, environmental security, and conflict in a national (Pakistan) and regional (South Asia) context using | - |  |  |  |  |  | ***** |  |  |  |  |  |
|  | Cunha et al. 2020 | ﻿Multi-criteria decision analysis (MCDA) is a useful tool for supporting interventions to overcome problems faced by water utilities due to inadequate network hydraulic capacity in the case of New York network tunnels | - |  |  |  |  |  |  |  |  | ***** |  |  |
|  | Psomas et al. 2018 | Evaluate and select agricultural water management measures using ﻿the Pinios River basin as a case study | Data analysis, DPSIR, WELF Nexus |  |  |  |  |  |  |  |  | ***** |  |  |
|  | RAPID 2021 | Assess the best value solution of water recycling option as part of the Southern Water, UK strategy to ensure ﻿a sufficient supply of water to customers during severe drought scenarios | - |  |  |  |  |  |  |  |  | ***** |  |  |
|  | Cordão et al. 2020 | Assess urban water shortage levels in Campina Grande, Brazil | Expert input, stakeholder engagement, GIS mapping |  |  |  |  |  |  |  |  |  |  | Risk mapping |
|  | Fuentes and Vervoort 2020 | ﻿Create a site suitability map for MAR projects in the Namoi Catchment, Australia and conduct a sensitivity analysis for the selection of an area of interest by combining highly suitable and low-sensitive areas | Data synthesis, pairwise comparisons |  |  |  |  |  |  |  |  |  |  | Assess project sites |
| **DPSIR** | Al-Kalbani et al. 2015 | Explore optimal approaches for sustainable use and management of mountain water in ﻿Al Jabal Al Akhdar, an arid mountain region in northern Oman | Data analysis, survey | ***** |  |  |  |  |  | ***** |  | ***** |  |  |
|  | Shammi et al. 2019 | Investigate the causes of ﻿drinking water sodium in ﻿the coastal region of Bangladesh and the effect on health | Literature review, survey | ***** |  |  |  |  |  | ***** |  |  |  |  |
|  | Wang et al. 2015 | Evaluate the evolution of soil and water conservation policy in ﻿n the Yellow River Basin, China. | Data analysis |  |  |  |  |  |  |  |  |  | ***** |  |
|  | Gari et al. 2018 | ﻿Analyse water quality problems within ﻿the Community Council of Alto and Medio Dagua | Literature review, ﻿Interview, observation and survey |  |  |  |  |  |  | ***** |  | ***** |  |  |
|  | Rehman et al. 2019 | ﻿Identify key stakeholders in disaster risk reduction and analyse various social, technical, institutional, cultural, infrastructural and environmental factors that contribute to flooding in Pakistan | ﻿Expert interviews, document analysis, CLD | ***** |  |  | ***** |  |  | ***** |  | ***** |  |  |
|  | Zare et al. 2019 | Develop a quantitative model through the integration of DPSIR and SDM. A case study of the Gorganroud-Gharesu Basin, in Iran, is used to illustrate the benefits of the proposed methodology. | SDM | ***** |  |  |  |  |  |  |  | ***** |  |  |
|  | van Ginkel et al. 2018 | Developed a water security dashboard of 56 indicators. | - |  |  |  |  |  |  |  |  |  | ***** |  |
|  | Koop and van Leeuwen 2015 | Evaluate the performance of urban water governance in 45 cities | Data Synthesis |  |  |  |  |  |  |  |  |  | ***** |  |
| **FCM** | Martinez et al. 2018 | Develop and apply a participatory modelling approach to identify the main interlinkages within the WEF nexus in Andalusia | CLD, participatory workshop, scenario analysis using group matrix |  |  | ***** | ***** |  |  |  |  |  |  |  |

**Summary of system tools’ application in water-related studies and their purposes**

- **Brainstorm (12) -** SSM (4), Backcasting (1), SDM (2), BBN (1), DPSIR (4)
- Identify Actors and Agents (2) – SNA (2)
- Facilitate Communication Among Stakeholders (8) – SSM(2), Backcasting (1), SDM (2), ABM (1), BBN (1), FCM (1)
- Visualise a System (8) – SSM (2), SDM (2), ABM (1), BBN (1), DPSIR (1), FCM (!)
- Set Objectives (2) – SSM (1), Backcasting (1)
- **Understand Behaviour (10) –** SDM (2), ABM (5), BBN (1), SNA (1), MCA/MCDA (1)
- Investigate Causes (9) – SDM (4), Backcasting (1), DPSIR (4)
- Computer Modelling (10) – SDM (4), ABM (4), BBN (2)
- **Evaluate Alternatives (17) –** SSM (4), Backcasting (1), ABM (3), BBN (2), MCA/MCDA (3), DPSIR (4)
- Monitor and Evaluate (3) – DPSIR (3)
- Others (2) - (MCA/MCDA for Risk Mapping and to Assess Project Sites)

**Reference**

Abdullah MF, Siraj S, Hodgett RE (2021) An overview of multi-criteria decision analysis (MCDA) application in managing water-related disaster events: Analyzing 20 years of literature for flood and drought events. Water (Switzerland) 13:. https://doi.org/10.3390/w13101358

Acaroglu L (2017) Tools for systems thinkers: Systems mapping. In: Disruptive Design. https://medium.com/disruptive-design/tools-for-systems-thinkers-systems-mapping-2db5cf30ab3a. Accessed 25 Jul 2023

Al-Kalbani MS, Price MF, O’Higgins T, et al (2015) Integrated environmental assessment to explore water resources management in Al Jabal Al Akhdar, Sultanate of Oman. Reg Environ Change. https://doi.org/10.1007/s10113-015-0864-4

Allen W, Kilvington M (2018) A Summary: An introduction to systems thinking and systemic design – concepts and tools (Presentation). 1–49

Aronson D, Daniel Angelakis Step-by-step Stock and Flows: Improving the rigor of your thinking. In: Syst Thinker. https://thesystemsthinker.com/step-by-step-stocks-and-flows-improving-the-rigor-of-your-thinking/. Accessed 27 Jul 2023

Badham J, Chattoe-Brown E, Gilbert N, et al (2018) Developing agent-based models of complex health behaviour. Health Place 54:170–177. https://doi.org/10.1016/j.healthplace.2018.08.022

Berglund EZ (2015) Using agent-based modeling for water resources planning and management. J Water Resour Plan Manag 1–17. https://doi.org/10.1061/(asce)wr.1943-5452.0000544

Bibri SE (2018) Backcasting in futures studies: A synthesized scholarly and planning approach to strategic smart sustainable city development. European Journal of Futures Research 6:. https://doi.org/10.1186/s40309-018-0142-z

Bowen GA (2009) Document analysis as a qualitative research method

Browning TR (2016) Design Structure Matrix methods and applications. In: TysonBrowning.com. https://www.tysonbrowning.com/teaching/design-structure-matrix-dsm-tutorial. Accessed 27 Jul 2023

Bryan Lindsley (2022) 75 systems thinking tools proven to give deeper insights. https://bryanlindsley.com/systems-thinking-tools/. Accessed 9 Feb 2023

Bunch MJ (2003) Soft systems methodology and the ecosystem approach: A system study of the Cooum River and environs in Chennai, India. Environ Manage 31:182–197. https://doi.org/10.1007/s00267-002-2721-8

Burge Hughes Walsh Systems thinking tools. In: Burge Hughes Walsh Limited. https://www.burgehugheswalsh.co.uk/Systems-Thinking/Tools.aspx. Accessed 9 Feb 2023

Burge S (2011) N2 Analysis (N2 or N2) – Alias Design Structure Matrix. The Systems Engineering Tool Box 1–17

Castonguay AC, Urich C, Iftekhar MS, Deletic A (2018) Modelling urban water management transitions: A case of rainwater harvesting. Environmental Modelling & Software 105:270–285. https://doi.org/10.1016/j.envsoft.2018.05.001

Chatzimichailidou M, Whyte J (2018) Systems engineering toolkit for infrastructure

Checkland P, Jim Scholes (1991) Soft Systems Methodology in action. John Wiley & Sons

Checklands P (1999) Systems Thinking. In: Wendy Currie, Galliers B (eds) Rethinking management information systems: An interdisciplinary perspective. Oxford University Press, pp 45–56

Childs PRN (2019) Design. In: Mechanical Engineering Handbook, 2nd Editio. pp 1–47

Christie CA (2006) Appreciative inquiry as a method for evaluation: An interview with Hallie Preskill. American Journal of Evaluation 27:466–474. https://doi.org/10.1177/1098214006294402

Coletta VR, Pagano A, Pluchinotta I, et al (2021) Causal Loop Diagrams for supporting nature based solutions participatory design and performance assessment. J Environ Manage 280:111668. https://doi.org/10.1016/j.jenvman.2020.111668

Cordão MJ de S, Rufino IAA, Barros Ramalho Alves P, Barros Filho MNM (2020) Water shortage risk mapping: a GIS-MCDA approach for a medium-sized city in the Brazilian semi-arid region. Urban Water J 17:642–655. https://doi.org/10.1080/1573062X.2020.1804596

Cunha M, Marques J, Savić D (2020) A flexible approach for the reinforcement of water networks using multi-criteria decision analysis. Water Resources Management. https://doi.org/10.1007/s11269-020-02655-9

D’Agostino D, Borg M, Hallett SHH, et al (2020) Multi-stakeholder analysis to improve agricultural water management policy and practice in Malta. Agric Water Manag 229:105920. https://doi.org/10.1016/j.agwat.2019.105920

Dalkin S, Lhussier M, Williams L, et al (2018) Exploring the use of Soft Systems Methodology with realist approaches: A novel way to map programme complexity and develop and refine programme theory. Evaluation 24:84–97. https://doi.org/10.1177/1356389017749036

DEFRA (Department of Environment Food and Rural Affairs) (2022) Integrating a systems approach into Defra. In: DEFRA. https://www.gov.uk/government/publications/integrating-a-systems-approach-into-defra/integrating-a-systems-approach-into-defra. Accessed 30 May 2022

Deng G, Lu F, Wu L, Xu C (2021) Social network analysis of virtual water trade among major countries in the world. Science of the Total Environment 753:142043. https://doi.org/10.1016/j.scitotenv.2020.142043

Dodge Y (2008) Q-Q Plot (Quantile to Quantile Plot). In: The Concise Encyclopedia of Statistics. pp 437–439

Dreborg KH (1996) Essence of backcasting. Futures 28:813–828. https://doi.org/10.1016/S0016-3287(96)00044-4

European Union (2021) Managing complexity (and chaos) in times of crisis. Publication Office of the European Union

Fischer J, Riechers M (2019) A leverage points perspective on sustainability. People and Nature 1:115–120. https://doi.org/10.1002/pan3.13

Fuentes I, Vervoort RW (2020) Site suitability and water availability for a managed aquifer recharge project in the Namoi basin, Australia. J Hydrol Reg Stud 27:1–18. https://doi.org/10.1016/j.ejrh.2019.100657

Gari SR, Ortiz Guerrero CE, A-Uribe B, et al (2018) A DPSIR-analysis of water uses and related water quality issues in the Colombian Alto and Medio Dagua Community Council. Water Science 32:318–337. https://doi.org/10.1016/j.wsj.2018.06.001

Government Office for Science (2022) Systems thinking: An introductory systems thinking toolkit for civil servants. Government Office for Science United Kingdom

Gregory AJ, Atkins JP, Burdon D, Elliott M (2013) A problem structuring method for ecosystem-based management: The DPSIR modelling process. Eur J Oper Res 227:558–569. https://doi.org/10.1016/j.ejor.2012.11.020

Haddaway NR, Woodcock P, Macura B, Collins A (2015) Making literature reviews more reliable through application of lessons from systematic reviews. Conservation Biology 29:1596–1605. https://doi.org/10.1111/cobi.12541

Hassan M, Afridi MK, Khan MI (2019) Water security and environmental security in a national and regional context: Envisioning environmental diplomacy for cooperation. Water Policy 21:1139–1161. https://doi.org/10.2166/wp.2019.072

Heath BL, Hill RR (2010) Some insights into the emergence of agent-based modelling. Journal of Simulation 4:163–169. https://doi.org/10.1057/jos.2010.16

Home Office (2016) Social network analysis: How to guide

Huber R, Bakker M, Balmann A, et al (2018) Representation of decision-making in European agricultural agent-based models. Agric Syst 167:143–160. https://doi.org/10.1016/j.agsy.2018.09.007

Jackson MC (2019) Critical systems thinking and the management of complexity: Responsible leadership for a complex world. John Wiley & Sons

James KL, Randall NP, Haddaway NR (2016) A methodology for systematic mapping in environmental sciences. Environ Evid 5:1–13. https://doi.org/10.1186/s13750-016-0059-6

Jayswal A, Li X, Zanwar A, et al (2011) A sustainability root cause analysis methodology and its application. Comput Chem Eng 35:2786–2798. https://doi.org/10.1016/j.compchemeng.2011.05.004

Joshi N, Tamaddun K, Parajuli R, et al (2020) Future changes in water supply and demand for Las Vegas Valley: A system dynamic approach based on CMIP3 and CMIP5 climate projections. Hydrology 7:1–28. https://doi.org/10.3390/hydrology7010016

Kabir G, Tesfamariam S, Francisque A, Sadiq R (2015) Evaluating risk of water mains failure using a Bayesian belief network model. Eur J Oper Res 240:220–234. https://doi.org/10.1016/j.ejor.2014.06.033

Kandiah VK, Berglund EZ, Binder AR (2019) An agent-based modeling approach to project adoption of water reuse and evaluate expansion plans within a sociotechnical water infrastructure system. Sustain Cities Soc 46:101412. https://doi.org/10.1016/j.scs.2018.12.040

Kim D A pallete of systems thinking tools. In: Syst Thinker. https://thesystemsthinker.com/a-palette-of-systems-thinking-tools/. Accessed 27 Jul 2023

Kim DH (2000) Systems thinking tools: A user’s reference guide. Pegasus Communications, Inc.

Kok K (2009) The potential of Fuzzy Cognitive Maps for semi-quantitative scenario development, with an example from Brazil. Global Environmental Change 19:122–133. https://doi.org/10.1016/j.gloenvcha.2008.08.003

Koop SHA, van Leeuwen CJ (2015) Assessment of the sustainability of water resources management: A critical review of the City Blueprint Approach. Water Resources Management 29:5649–5670. https://doi.org/10.1007/s11269-015-1139-z

Kotir JH, Smith C, Brown G, et al (2016) A system dynamics simulation model for sustainable water resources management and agricultural development in the Volta River Basin, Ghana. Science of the Total Environment 573:444–457. https://doi.org/10.1016/j.scitotenv.2016.08.081

Koutiva, Makropoulos (2019) Exploring the Effects of Alternative Water Demand Management Strategies Using an Agent-Based Model. Water (Basel) 11:2216. https://doi.org/10.3390/w11112216

Kristensen P (2004) The DPSIR framework. A comprehensive / detailed assessment of the vulnerability of water resources to environmental change in Africa using river basin approach 1–10

Leung P (2016) Backcasting: Starting with the end in mind. In: Energy Futures Corner, Innovation Tools & Resources. https://energyfutureslab.com/backcasting-starting-with-the-end-in-mind/

Mahaffy PG, Matlin SA, Holme TA, MacKellar J (2019) Systems thinking for education about the molecular basis of sustainability. Nat Sustain 2:362–370. https://doi.org/10.1038/s41893-019-0285-3

Markowska J, Szalińska W, Dąbrowska J, Brząkała M (2020) The concept of a participatory approach to water management on a reservoir in response to wicked problems. J Environ Manage 259:1–14. https://doi.org/10.1016/j.jenvman.2019.109626

Martinez P, Blanco M, Castro-Campos B (2018) The water-energy-food nexus: A fuzzy-cognitive mapping approach to support nexus-compliant policies in Andalusia (Spain). Water (Switzerland) 10:1–17. https://doi.org/10.3390/w10050664

Mayers J, Vermeulen S (2005) Stakeholder influence mapping. Development 1–16

McCourt W (1997) Discussion note: Using metaphors to understand and to change organizations: A critique of Gareth Morgan’s approach. Organization Studies 18:511–522. https://doi.org/10.1177/017084069701800307

Meadows D (1999) Leverage points: Places to intervene in a system. Academy for Systems Change 1–18

Mishra P, Bhatnagar J (2012) Appreciative inquiry: Models & applications. 47:543–558

Monat JP, Gannon TF (2015) What is systems thinking? A Review of selected literature plus recommendations. American Journal of Systems Science 4:11–26. https://doi.org/10.5923/j.ajss.20150401.02

Morgan H (2022) Conducting a qualitative document analysis. The Qualitative Report 27:64–77. https://doi.org/10.46743/2160-3715/2022.5044

Murata T (1989) Petri Nets: Properties, analysis and applications. Proceedings of the IEEE 77:541–580

Nabiafjadi S, Sharifzadeh M, Ahmad M (2021) Social network analysis for identifying actors engaged in water governance: An endorheic basin case in the Middle East. J Environ Manage 288:1–13. https://doi.org/10.1016/j.jenvman.2021.112376

Nguyen NC, Bosch OJH (2013) A systems thinking approach to identify leverage points for sustainability: A case study in the Cat Ba Biosphere Reserve, Vietnam. Syst Res Behav Sci 30:104–115. https://doi.org/10.1002/sres.2145

Pagano A, Pluchinotta I, Giordano R, Fratino U (2018) Integrating “hard” and “soft” infrastructural resilience assessment for water distribution systems. Complexity 2018:. https://doi.org/10.1155/2018/3074791

Pagano A, Pluchinotta I, Pengal P, et al (2019) Engaging stakeholders in the assessment of NBS effectiveness in flood risk reduction: A participatory System Dynamics Model for benefits and co-benefits evaluation. Science of the Total Environment 690:543–555. https://doi.org/10.1016/j.scitotenv.2019.07.059

Phan TD, Bertone E, Stewart RA (2021) Critical review of system dynamics modelling applications for water resources planning and management. Cleaner Environmental Systems 2:100031. https://doi.org/10.1016/j.cesys.2021.100031

Phan TD, Smart JCR, Capon SJ, et al (2016) Applications of Bayesian Belief Networks in water resource management: A systematic review. Environmental Modelling & Software 85:98–111. https://doi.org/10.1016/j.envsoft.2016.08.006

Pluchinotta I, Pagano A, Giordano R, Tsoukiàs A (2018) A system dynamics model for supporting decision-makers in irrigation water management. J Environ Manage 223:815–824. https://doi.org/10.1016/j.jenvman.2018.06.083

Pluchinotta I, Pagano A, Vilcan T, et al (2021) A participatory system dynamics model to investigate sustainable urban water management in Ebbsfleet Garden City. Sustain Cities Soc 67:1–13. https://doi.org/10.1016/j.scs.2021.102709

Pouladi P, Afshar A, Molajou A, Afshar MH (2020) Socio-hydrological framework for investigating farmers’ activities affecting the shrinkage of Urmia Lake; hybrid data mining and agent-based modelling. Hydrological Sciences Journal 65:1249–1261. https://doi.org/10.1080/02626667.2020.1749763

Psomas A, Vryzidis I, Spyridakos A, Mimikou M (2018) MCDA approach for agricultural water management in the context of water–energy–land–food nexus. Operational Research. https://doi.org/10.1007/s12351-018-0436-8

Quist J (2007) Backcasting for a sustainable future: The impact after 10 years

Rahmati-Khameneh S, Mehrabi T, Izadi-Dehnavi M, Zargham-Boroujeni A (2011) The process of major depressive disorder (MDD) in women referred to the health centers. Iran J Nurs Midwifery Res 16:244–252

Ram SA, Irfan ZB (2021) Application of system thinking causal loop modelling in understanding water crisis in India: A case for sustainable integrated water resources management across sectors. HydroResearch 4:1–10. https://doi.org/10.1016/j.hydres.2021.02.001

RAPID (Regulators’ Alliance for Progressing Infrastructure Development) (2021) Strategic solution gate 2 submission: Detailed feasibility & concept design report ii water recycling

Rehman J, Sohaib O, Asif M, Pradhan B (2019) Applying systems thinking to flood disaster management for a sustainable development. International Journal of Disaster Risk Reduction 36:1–10. https://doi.org/10.1016/j.ijdrr.2019.101101

Rezaee Z, Azar A, Erz AMB, Nayeri MD (2019) Application of Viable System Model in diagnosis of organizational structure. Syst Pract Action Res 32:273–295. https://doi.org/10.1007/s11213-018-9454-y

Richards R, Sanó M, Roiko A, et al (2013) Bayesian Belief modeling of climate change impacts for informing regional adaptation options. Environmental Modelling and Software 44:113–121. https://doi.org/10.1016/j.envsoft.2012.07.008

Rojas R, Castilla-Rho J, Bennison G, et al (2022) Participatory and integrated modelling under contentious water use in semiarid basins. Hydrology 9:1–27. https://doi.org/10.3390/hydrology9030049

Rooney JJ, Vanden Hauvel LN (2004) Root cause analysis for beginners. Qual Prog 37:45–53

Saeedi I, Mikaeili Tabrizi AR, Bahremand A, Salmanmahiny A (2022) A soft systems methodology and interpretive structural modeling framework for green infrastructure development to control runoff in Tehran metropolis. Nat Resour Model 1–26. https://doi.org/10.1111/nrm.12339

Sauser B, Mansouri M, Omer M (2020) Using Systemigrams in Problem Definition: A Case Study in Maritime Resilience for Homeland Security. J Homel Secur Emerg Manag 8:. https://doi.org/10.2202/1547-7355.1773

Senge P m. (1997) The fifth discipline. Measuring Business Excellence

Shammi M, Rahman MdM, Bondad SE, Bodrud-Doza Md (2019) Impacts of salinity intrusion in community health: A review of experiences on drinking water sodium from coastal areas of Bangladesh. Healthcare 7:1–19. https://doi.org/10.3390/healthcare7010050

Shelton RE, Baeza A, Janssen MA, Eakin H (2018) Managing household socio-hydrological risk in Mexico city: A game to communicate and validate computational modeling with stakeholders. J Environ Manage 227:200–208. https://doi.org/10.1016/j.jenvman.2018.08.094

Singto C, Fleskens L, Vos J, Quinn C (2020) Applying Bayesian Belief Networks (BBNs) with stakeholders to explore and codesign options for water resource interventions. Sustain Water Resour Manag 6:1–17. https://doi.org/10.1007/s40899-020-00383-x

Squires A, Pyster A, Sauser B, et al (2010) Applying systems thinking via SystemigramsTM for defining the body of knowledge and curriculum to advance systems engineering (BKCASE) project. 20th Annual International Symposium of the International Council on Systems Engineering, INCOSE 2010 1:739–753. https://doi.org/10.1002/j.2334-5837.2010.tb01101.x

Stanghellini PSL (2010) Stakeholder involvement in water management: The role of the stakeholder analysis within participatory processes. Water Policy 12:675–694. https://doi.org/10.2166/wp.2010.004

Stroh DP (2015) Systems thinking for social change: A practical guide to solving complex problems, avoiding unintended consequences and achieving lasting results. Chelsea Green Publishing

Suriya S, Mudgal B V. (2013) Soft systems methodology and integrated flood management: A study of the Adayar watershed, Chennai, India. Water and Environment Journal 27:462–473. https://doi.org/10.1111/j.1747-6593.2012.00365.x

Swiss Tropical and Public Health Institute Applied systems thinking for health systems research

Ulrich W (2005) A brief introduction to Critical Systems Heuristics (CSH). In: Electronic/Ecological Collaborative Sense-making Support System. http://www.ecosensus.info/about/index.html. Accessed 13 Jun 2023

van Ginkel KCH, Hoekstra AY, Buurman J, Hogeboom RJ (2018) Urban water security dashboard: Systems approach to characterizing the water security of cities. J Water Resour Plan Manag 144:1–11. https://doi.org/10.1061/(ASCE)WR.1943-5452.0000997

Voulvoulis N, Giakoumis T, Hunt C, et al (2022) Systems thinking as a paradigm shift for sustainability transformation. Global Environmental Change 75:1–7. https://doi.org/10.1016/j.gloenvcha.2022.102544

Wan Rosely WIH, Voulvoulis N (2022) Systems thinking for the sustainability transformation of urban water systems. Crit Rev Environ Sci Technol 0:1–21. https://doi.org/10.1080/10643389.2022.2131338

Wang F, Mu X, Li R, et al (2015) Co-evolution of soil and water conservation policy and human-environment linkages in the Yellow River Basin since 1949. Science of the Total Environment 508:166–177. https://doi.org/10.1016/j.scitotenv.2014.11.055

WWAP, UNESCO, WWAP, UNESCO (2019) The United Nations World Water Development Report 2019: Leaving no one behind

Zare F, Elsawah S, Bagheri A, et al (2019) Improved integrated water resource modelling by combining DPSIR and system dynamics conceptual modelling techniques. J Environ Manage 246:27–41. https://doi.org/10.1016/j.jenvman.2019.05.033

Check, plan, do. In: Vanguard Consulting Limited. https://beyondcommandandcontrol.com/library/systems-principles/check-plan-do/
